# Supplementary material for: Diagnosing small fiber neuropathy in clinical practice: a deep phenotyping study
Source: PubMed Central journal article supplement — Ther Adv Neurol Disord. 2021 Mar 23;14:17562864211004318. doi: 10.1177/17562864211004318 (PMC8283814; doi:10.1177/17562864211004318), 2021-03-23
Supplement: sj-pdf-2-tan-10.1177_17562864211004318.pdf [file sj-pdf-2-tan-10.1177_17562864211004318.pdf]

**Supplementary Table: Analgesic medication of study cohort.**

| <b>Patient ID<br/>#</b> | <b>Generic</b>     | <b>Daily intake regimen</b> | <b>Daily dose<br/>(mg)</b> | <b>Treatment<br/>response:<br/>1 = yes,<br/>0 = no</b> |
|-------------------------|--------------------|-----------------------------|----------------------------|--------------------------------------------------------|
| 1001                    | Amitriptyline      | 0-0-1                       | 25                         | 0                                                      |
| 1002                    | No medication      | -                           | -                          | -                                                      |
| 1003                    | Duloxetine         | 30/60 mg alternating        | 45                         | Unknown                                                |
| 1004                    | Pregabalin         | 1-0-1                       | 225                        | 0                                                      |
|                         | L-DOPA comp. ret.  | 0-0-1/0-0-2 alternating     | 100/25                     | 1                                                      |
| 1005                    | No medication      | -                           | -                          | -                                                      |
| 1006                    | Magnesium          | 0-0-1                       | 400                        | 0                                                      |
| 1007                    | No medication      | -                           | -                          | -                                                      |
| 1008                    | Ibuprofen          | On demand                   | NA                         | 1                                                      |
| 1009                    | No medication      | -                           | -                          | -                                                      |
| 1010                    | Gabapentin         | 2 x per day                 | 600                        | Unknown                                                |
|                         | Amitriptyline      | On demand                   | NA                         | Unknown                                                |
|                         | Capsaicin 8% patch | Every three months          | -                          | Unknown                                                |
| 1011                    | No medication      | -                           | -                          | -                                                      |
| 1012                    | Ibuprofen          | On demand                   | NA                         | Unknown                                                |
| 1013                    | No medication      | -                           | -                          | -                                                      |
| 1016                    | Ibuprofen          | On demand                   | NA                         | Unknown                                                |
| 1018                    | Mirtazapine        | 0-0-1                       | 15                         | 0                                                      |
|                         | Venlafaxine        | 1-0-0                       | 75                         | 0                                                      |
| 1020                    | Gabapentin         | 1-1-1                       | 600                        | 1                                                      |
|                         | Nortriptyline      | 0-0-2                       | 25                         | 1                                                      |
| 1021                    | No medication      | -                           | -                          | -                                                      |
| 1022                    | Gabapentin         | 1-1-1                       | 2400                       | 1                                                      |
| 1023                    | Duloxetine         | 1-0-0                       | 60                         | 1                                                      |
| 1024                    | Pregabalin         | 1-0-1                       | 150                        | 1                                                      |
| 1025                    | Pregabalin         | 1-0-0                       | 75                         | 0                                                      |
| 1031                    | No medication      | -                           | -                          | -                                                      |
| 1033                    | Capsaicin 8% patch | Every 6 months              | -                          | 1                                                      |
|                         | Duloxetine         | 2-1-0                       | 90                         | 0                                                      |
| 1034                    | Ibuprofen          | On demand                   | NA                         | Unknown                                                |
|                         | Etoricoxib         | On demand                   | NA                         | Unknown                                                |
| 1036                    | Gabapentin         | 1.5 – 1.5 - 1               | 3200                       | 1                                                      |
| 1038                    | No medication      | -                           | -                          | -                                                      |
| 1039                    | Lidocain emulsion  | On demand                   | NA                         | 1                                                      |
|                         | Gabapentin         | 1-1-1                       | 3000                       | 0                                                      |
| 1040                    | Cannabinoid        | 0-0-1                       | 1 joint                    | 1                                                      |
| 1041                    | Ketoprofen         | 1-0-1                       | 100                        | 0                                                      |
|                         | Tilidine           | 1-0-1                       | 200                        | 1                                                      |
|                         | Metamizole         | 1-1-1                       | 1500                       | Unknown                                                |
| 1042                    | No medication      | -                           | -                          | 0                                                      |
| 1043                    | Gabapentin         | 1-1-1                       | 2700                       | 1                                                      |

|      |                        |             |        |         |
|------|------------------------|-------------|--------|---------|
|      | Amitriptyline          | 1 x per day | 50     | 1       |
| 1044 | Oxycodone/<br>naloxone | 0-0-1       | 20     | 1       |
| 1046 | Oxycodone/<br>naloxone | On demand   | NA     | 0       |
|      | Ibuprofen              | On demand   | NA     | 0       |
|      | Etoricoxib             | On demand   | NA     | 0       |
|      | Diclofenac             | On demand   | NA     | 0       |
| 1048 | Ibuprofen              | On demand   | NA     | 0       |
| 1049 | Gabapentin             | 1-1-1       | 900    | 1       |
| 1050 | Pregabalin             | 1-0-1       | 325    | 1       |
|      | Oxycodone/<br>naloxone | 1-0-1       | 40     | 1       |
|      | Amitriptylin-oxide     | 1-0-0-2     | 90     | 1       |
|      | Metamizole             | 1-1-1       | 1500   | 1       |
| 1052 | Gabapentin             | 1-1-1       | 1800   | 1       |
|      | Amitriptyline          | 0-0-1       | 75     | Unknown |
|      | Metamizole             | On demand   | NA     | 1       |
| 1053 | No medication          | -           | -      |         |
| 1054 | Gabapentin             | 1-1-1       | 300    | 1       |
| 1056 | No medication          |             |        |         |
| 1057 | Doxepin                | 0-0-1       | 25     | 0       |
| 1058 | Pregabalin             | 0-0-1       | 75     | 1       |
| 1059 | Amitriptyline          | 0-0-1       | 12.5   | -       |
| 1069 | Amitriptyline          | 0-0-1       | 75     | Unknown |
|      | Pregabalin             | 1-0-1       | 150    | 0       |
| 1071 | Carbamazepine          | 1-0-0       | 200    | 1       |
| 1076 | Pregabalin             | 1-0-2       | 225    | 1       |
|      | Duloxetine             | 1-0-0       | 60     | 1       |
|      | Metamizole             | On demand   | NA     | Unknown |
| 1077 | No medication          | -           | -      | -       |
| 1082 | Amitriptyline          | 0-0-1       | 20     | 1       |
|      | Duloxetine             | 1-0-0       | 60     | 1       |
| 1083 | No medication          | -           | -      | -       |
| 1084 | No medication          | -           | -      | -       |
| 1085 | Alpha-lipoic acid      | 1-0-0       | 600    | 0       |
| 1086 | Amitriptyline          | 0-0-1       | 3 gtt  | 1       |
|      | Gabapentin             | 1-1-2       | 1200   | 1       |
|      | Tramadol               | 1-1-1       | 45 gtt | 1       |
| 1088 | No medication          | -           | -      | -       |
| 1089 | Amitriptyline          | 0-0-1       | 50     | Unknown |
|      | Carbamazepine          | 1-0-1       | 800    | Unknown |
|      | Ibuprofen              | On demand   | NA     | 1       |

|      |                          |                 |         |         |
|------|--------------------------|-----------------|---------|---------|
| 1090 | Pregabalin oral solution | 1-1-1           | 360     | 1       |
|      | Duloxetine               | 1-0-0           | 60      | Unknown |
| 1091 | Paracetamol              | On demand       | NA      | 1       |
| 1092 | No medication            | -               | -       | -       |
| 1093 | Metamizole               | On demand       | NA      | 0       |
|      | Duloxetine               | 1-0-0           | 60      | 1       |
| 1094 | Gabapentin               | 1-1-1           | 1200    | 1       |
| 1095 | Pregabalin               | 1-0-1           | 300     | 1       |
|      | Oxcarbazepine            | 1-0-1           | 300     | 1       |
|      | Amitriptyline            | 1-0-0           | 30      | 1       |
| 1096 | No medication            | -               | -       | -       |
| 1097 | Ibuprofen                | On demand       | NA      | 0       |
| 1099 | Pregabalin               | 1-0-1           | 300     | 1       |
|      | Tilidin                  | On demand       | NA      | 1       |
|      | Amitriptyline            | On demand       | NA      | 1       |
| 1100 | Duloxetine               | 1-0-0           | 30      | 1       |
|      | Pregabalin               | 0-0-1           | 150     | 1       |
| 1101 | Pregabalin               | 1-0-1           | 300     | 1       |
|      | Amitriptyline            | 0-0-1           | 50      | 1       |
|      | Metamizole               | On demand       | NA      | 1       |
| 1102 | No medication            | -               | -       | -       |
| 1103 | Tapentadol, ret.         | On demand       | NA      | 1       |
| 1104 | Quetiapin                | 0-0-1           | 25      | 0       |
|      | Duloxetine               | 1-0-0           | 60      | 1       |
|      | Gabapentin               | 1-1-1           | 900     | 1       |
| 1105 | No medication            | -               | -       | -       |
| 1106 | No medication            | -               | -       | -       |
| 1107 | No medication            | -               | -       | -       |
| 1108 | No medication            | -               | -       | -       |
| 1109 | No medication            | -               | -       | -       |
| 1110 | No medication            | -               | -       | -       |
| 1111 | Pregabalin               | On demand       | NA      | 1       |
| 1113 | Lamotrigin               | 2-0-0           | 50      | 1       |
| 1115 | Pregabalin               | 1-0-1           | 300     | 1       |
|      | Carbamazepine            | 1-0-1           | 300     | 1       |
|      | Doxepin                  | 0-0-1           | 100     | 1       |
|      | Buprenorphin             | Every third day | 52.5    | 1       |
|      | Buprenorphin             | On demand       | NA      | 1       |
|      | Lorazepam                | On demand       | NA      | 1       |
| 1117 | No medication            | -               | -       | -       |
| 1119 | Gabapentin               | 1-1-1           | 1800    | 1       |
|      | Duloxetine               | Every other day | 20      | 1       |
|      | Opipramol                | 0-0-1           | 25      | Unknown |
|      | Cannabidiol              | 1-1-1           | Unknown | Unknown |
|      | Palmitoylethanolamid     | 2-0-2           | 1200    | 1       |

|      |                |           |       |         |
|------|----------------|-----------|-------|---------|
| 1121 | Paracetamol    | On demand | NA    |         |
|      | Tramadol       | On demand | NA    |         |
| 1122 | No medication  | -         | -     | -       |
| 1124 | No medication  | -         | -     | -       |
| 1125 | Pregabalin     | 1-1-1     | 450   | 1       |
|      | Metamizole     | 1-1-1-1   | 2000  | 1       |
|      | Phenytoin      | 1-0-1     | 400   | Unknown |
| 1127 | Gabapentin     | 1-1-1     | 1800  | 1       |
| 1128 | No medication  | -         | -     | -       |
| 1130 | Ibuprofen      | On demand | NA    | 1       |
|      | Arcoxia        | 1-0-0     | 90    | 1       |
|      | Gabapentin     | 0-0-1     | 100   | Unknown |
|      | Lidocain creme | 1-0-1     | Creme | 1       |
| 1133 | Gabapentin     | 1-1-1     | 1200  | 1       |
|      | Amitriptyline  | 0-0-1     | 8 gtt | 1       |
|      | Fluoxetine     | 1-0-0     | 30    | 1       |
|      | Metamizole     | On demand | NA    | 1       |

Abbreviations: NA = not applicable, ret. = retarded, gtt = guttae.
